# Supplementary material
Source: Springer Nature journal article supplement (https://www.springermedizin.de/resource/supplementary/12990_2009_248_MOESM7_ESM.pdf/9612880)

# A Glycine receptor subunits

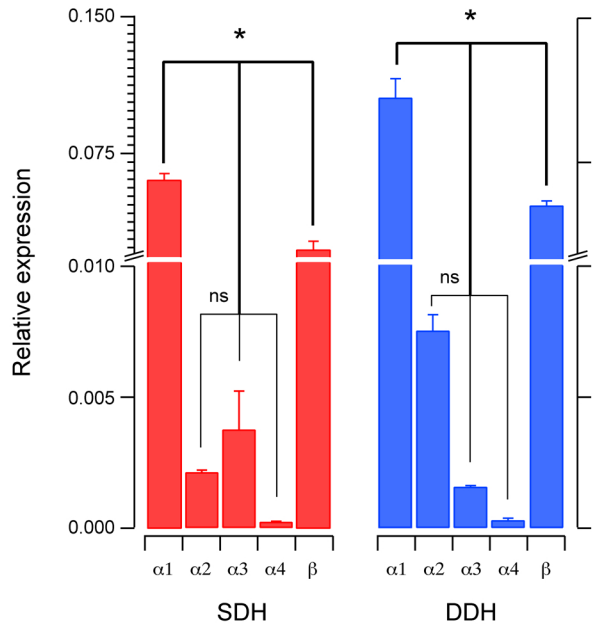

# B GABA<sub>A</sub> receptor subunits

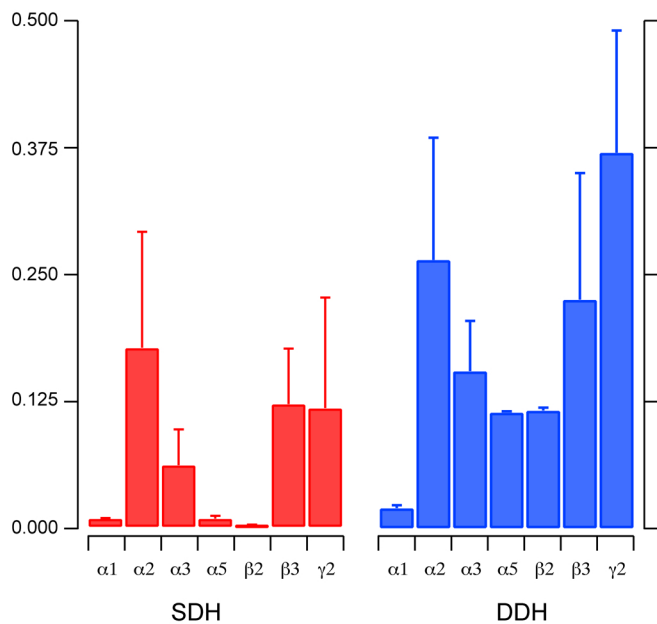

Supplement: MOESM7 [file 9612880]
